# Supplementary figures and images for: miR‐210 Participates in Hepatic Ischemia Reperfusion Injury by Forming a Negative Feedback Loop With SMAD4
Source: PubMed Central journal article supplement — Hepatology. 2020 Sep 2;72(6):2134–48. doi: 10.1002/hep.31221 (PMC7818437; doi:10.1002/hep.31221), 2020-09-02

A

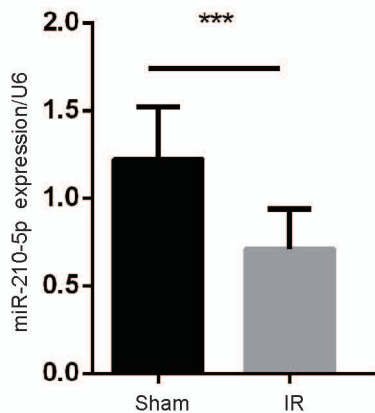

B

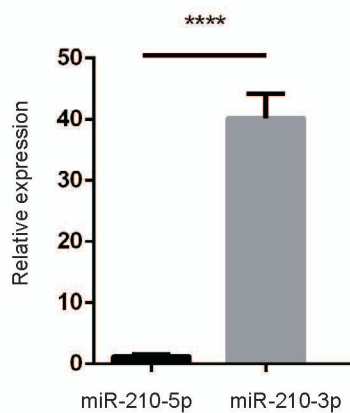

C

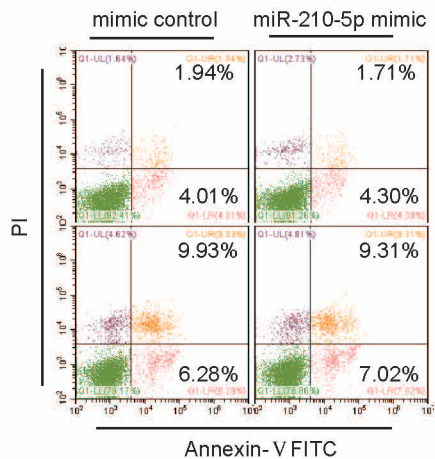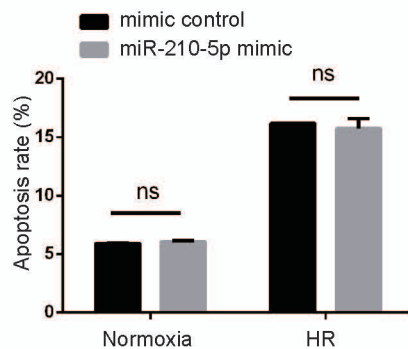

inhibitor control      miR-210-5p inhibitor

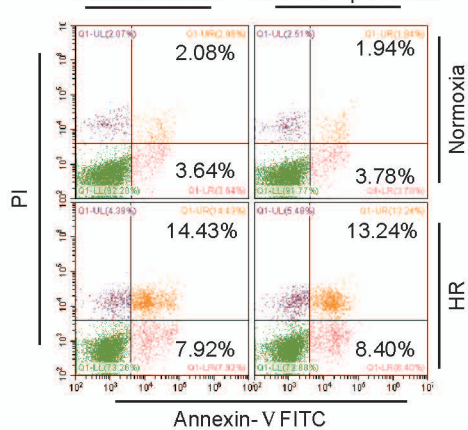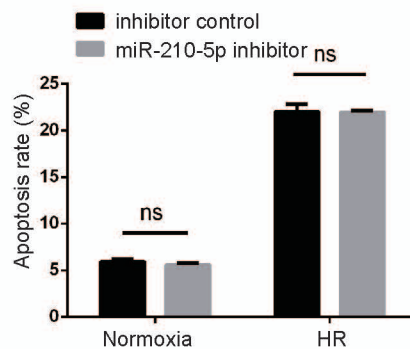

A

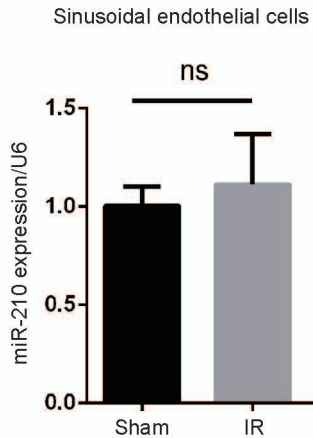

B

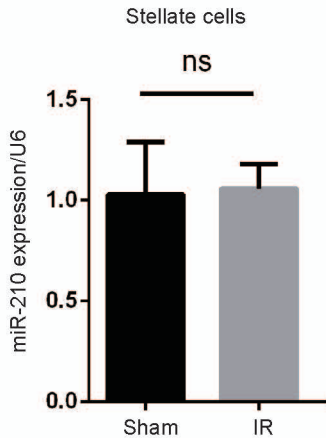

C

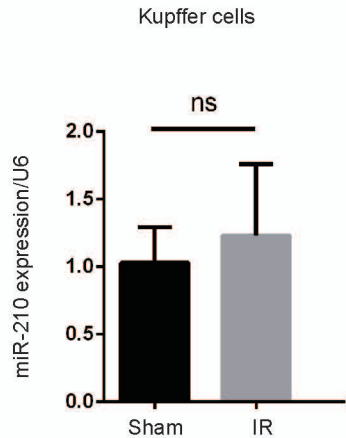

**A**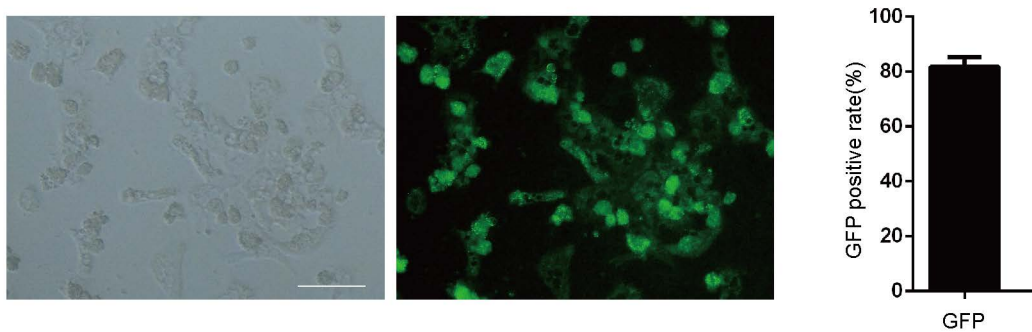**B**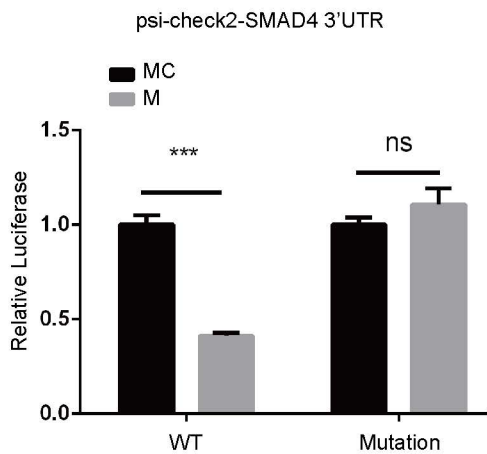**C**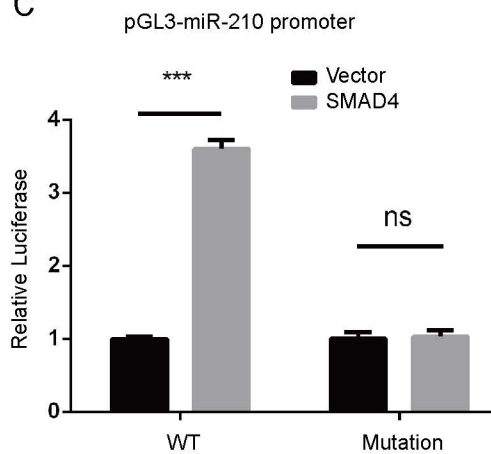

SMAD4

DAPI

Merge

Normoxia

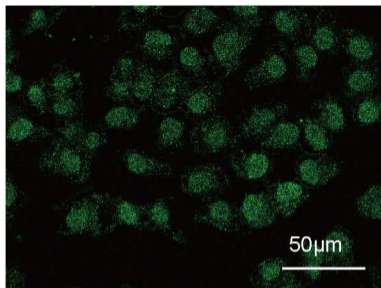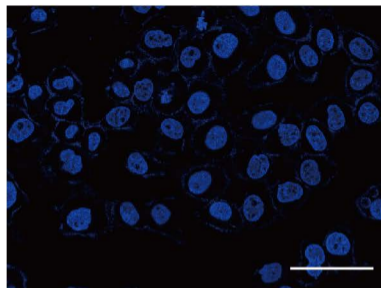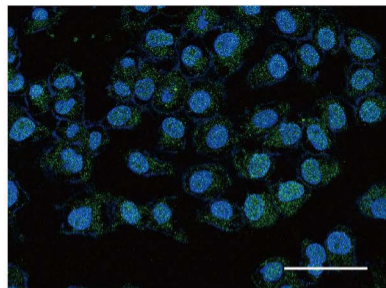

Hypoxia

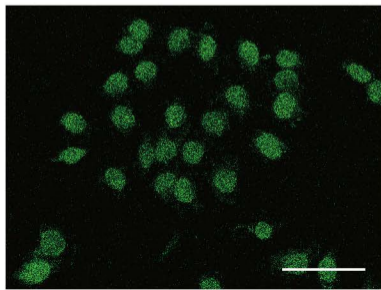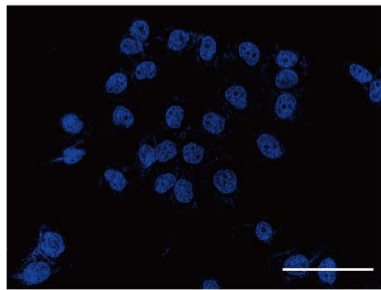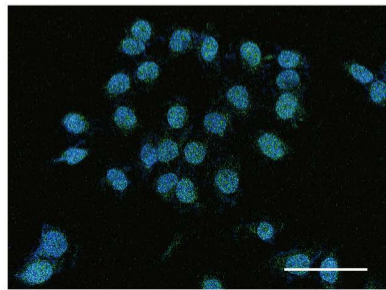

Supplement: HEP-72-2134-s001.pdf [file HEP-72-2134-s001.pdf]
